# Supplementary material for: Quantitative real-time in-cell imaging reveals heterogeneous clusters of proteins prior to condensation
Source: PubMed Central journal article supplement (PMC10427612; doi:10.1038/s41467-023-40540-2), 2023-08-15
Supplement: 41467_2023_40540_MOESM3_ESM.pdf [file 41467_2023_40540_MOESM3_ESM.pdf]

## **Description of Additional Supplementary Files Document**

**Supplementary Movie 1:** Z-scan view of Fig. 1. The nuclear lamina is stained by AF647 and appears in red. Scale bars 10  $\mu\text{m}$ .

**Supplementary Movie 2:** Three unstressed cells with NELFA-GFP. Scale bars 10  $\mu\text{m}$ .

**Supplementary Movie 3:** Machine-learningbased tracking of NELFA-GFP regions (unstressed cells).

**Supplementary Movie 4:** Nine cells (stressed, with arsenic exposure) showing NELFA-GFP phase separation at low expression levels. Scale bars 10  $\mu\text{m}$ . Orange rectangles mark regions of interest for the tracking of NELFAGFP regions.

**Supplementary Movie 5:** Machine-learningbased tracking of NELFA-GFP regions (stressed, with arsenic exposure).

**Supplementary Movie 6:** Time-resolved cluster size probability distribution in stressed and unstressed cells.

**Supplementary Movie 7:** Cluster formation in the presence of p38 inhibitor. Scale bars 10  $\mu\text{m}$ .

**Supplementary Movie 8:** Dissolution of condensates when stress is released (the medium is exchanged) and p38 inhibitor is added. Scale bars 10  $\mu\text{m}$ .
